# Supplementary material
Source: publisher figshare collection journal article supplement (https://springernature.figshare.com/ndownloader/files/17866106)

## **Additional file 1. Additional tables and figures**

**Title:** Identification and molecular characterization of a psychrophilic GH1  $\beta$ -glucosidase from the subtropical soil microorganism *Exiguobacterium* sp. GXG2

**Authors:** Bangqiao Yin<sup>1\*</sup>, Hengsen Gu<sup>1</sup>, Yue Xu<sup>1</sup>, Bing Yan<sup>2</sup>, Quanwen Li<sup>1</sup>, Qian Ou<sup>1</sup>, Bo Wu<sup>1</sup>, Chen Guo<sup>3\*\*</sup>, and Chengjian Jiang<sup>1,2\*\*\*</sup>

**Author details:**

<sup>1</sup> State Key Laboratory for Conservation and Utilization of Subtropical Agro-bioresources, College of Life Science and Technology, Guangxi University, 100 Daxue East Road, Nanning, Guangxi, 530004, P.R. China.

<sup>2</sup> Guangxi Key Laboratory of Mangrove Conservation and Utilization, Guangxi Mangrove Research Center, Guangxi Academy of Sciences, 92 Changqing Road, Beihai, Guangxi, 536000, P.R. China.

<sup>3</sup> Scientific Research Academy of Guangxi Environmental Protection, 5 Education Road, Nanning, Guangxi 530022, P.R. China.

\*, \*\* and \*\*\*: Corresponding Author

\*Bangqiao Yin:

Tel: +86-771-3239403; Fax: +86-771-3237873; E-mail: yinbangqiao@163.com

\*\*Chen Guo:

Tel: +86-771-3239403; Fax: +86-771-3237873; E-mail: 394176889@qq.com

\*\*\*Chengjian Jiang:

Tel: +86-771-3239403; Fax: +86-771-3237873; E-mail: jiangcj0520@gmail.com

**Additional Tables****Table S1** The results of homology modeling of BglG by multiple-template

| Name of Model       | molpdf      | DOPE score   | GA341 score |
|---------------------|-------------|--------------|-------------|
| query.B99990001.pdb | 13346.14160 | -58236.37891 | 1.00000     |
| query.B99990002.pdb | 13493.02832 | -57447.93359 | 1.00000     |
| query.B99990003.pdb | 13395.54688 | -57681.30078 | 1.00000     |

**Table S2** The evaluation of and multi-template model of BglG

| Model               | Ramachandran plot |       |       |        |           | G-factor | Errat   |        |
|---------------------|-------------------|-------|-------|--------|-----------|----------|---------|--------|
|                     | Core              | Allow | Gener | Disall | Dihedrals | Covalent | Overall |        |
| query.B99990001.pdb | 91.1%             | 7.4%  | 1.2%  | 0.2%   | 0.00      | -0.18    | -0.07   | 64.396 |

### Additional figure legends

**Fig. S1 Functional screening of gene library.** Hydrolyzing zones produced by *E.coli* strains harbored positive  $\beta$ -glucosidase genes on agar plates, containing ampicillin, esculin hydrate, and ferric ammonium citrate. A pGEMB0 clone was indicated by a black arrow.

**Fig. S2 Agarose gel electrophoresis of *bglG* gene.** Lane 1: 1kb DNA marker. Lane 2 and 3: *bglG* gene from pGEMB0.

**Fig. S3 The ramachandran plot of BglG multi-template model.**

**Fig. S4 The PROSA evaluation of BglG multi-template model.**

**Fig. S5 Compare the changes in surrounding residues of active sites E163 and E373 after mutant to glycine.** (A) The distribution of all amino acid residues 4 Å away from E163 site in BglG. Four residues (Thr218, Phe167, Ile166 and Asn295) were formed hydrogen bonds with Glu163 (bond length of 2.7, 3.1, 3.1 and 3.2 Å) among 11 residues. (B) The distribution of all amino acid residues 4 Å away from A163 site in BglG. After mutate E163 to A163, the number of amino acid residues about 4.0 Å from A163 was significantly reduced to 7 and only leave 3 hydrogen bonds. (C) The distribution of all amino acid residues 4 Å away from E373 site in BglG. Glu373 was hydrogen bonded to Asn374, Asn295, Asn163 and Leu294 with bond length of 2.6 and 3.0, 3.3 and 3.4 Å, respectively. (D) The distribution of all amino acid residues 4 Å away from A373 site in BglG. After mutate E373 to A373, A373 forms only two hydrogen bonds with Asn374 and Leu294 (3.0 and 3.4 Å). Red dotted line represents hydrogen bond. The active site residues are showed as red for the C $_{\alpha}$  atoms, while the residues around active sites are showed as green sticks.

Fig. S1

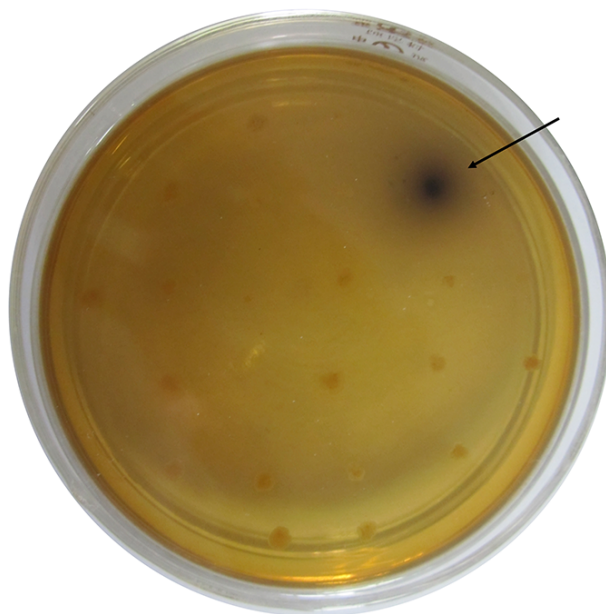

Fig. S2

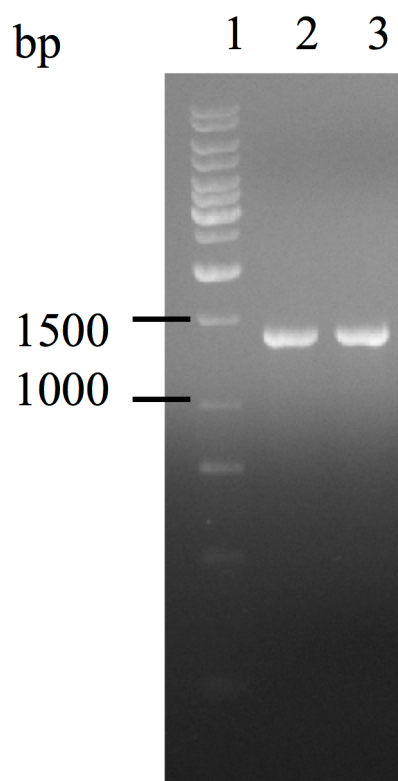

Fig. S3

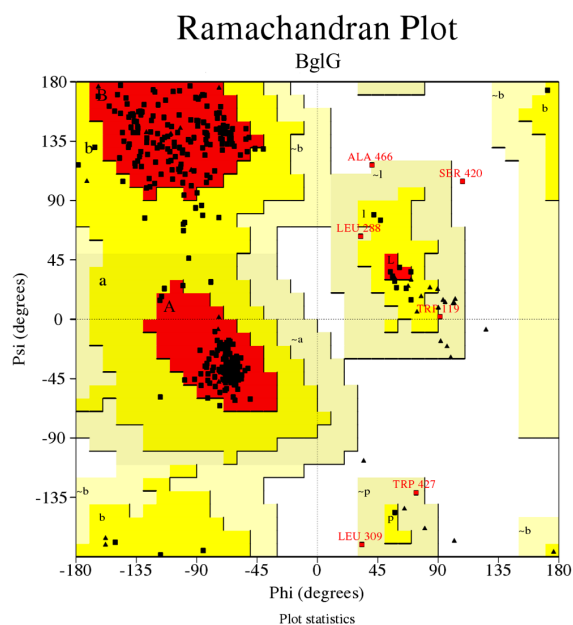

Fig. S4

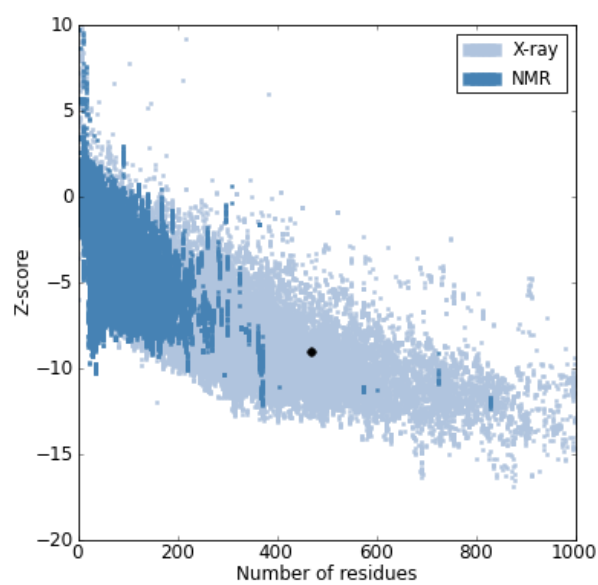

Fig. S5

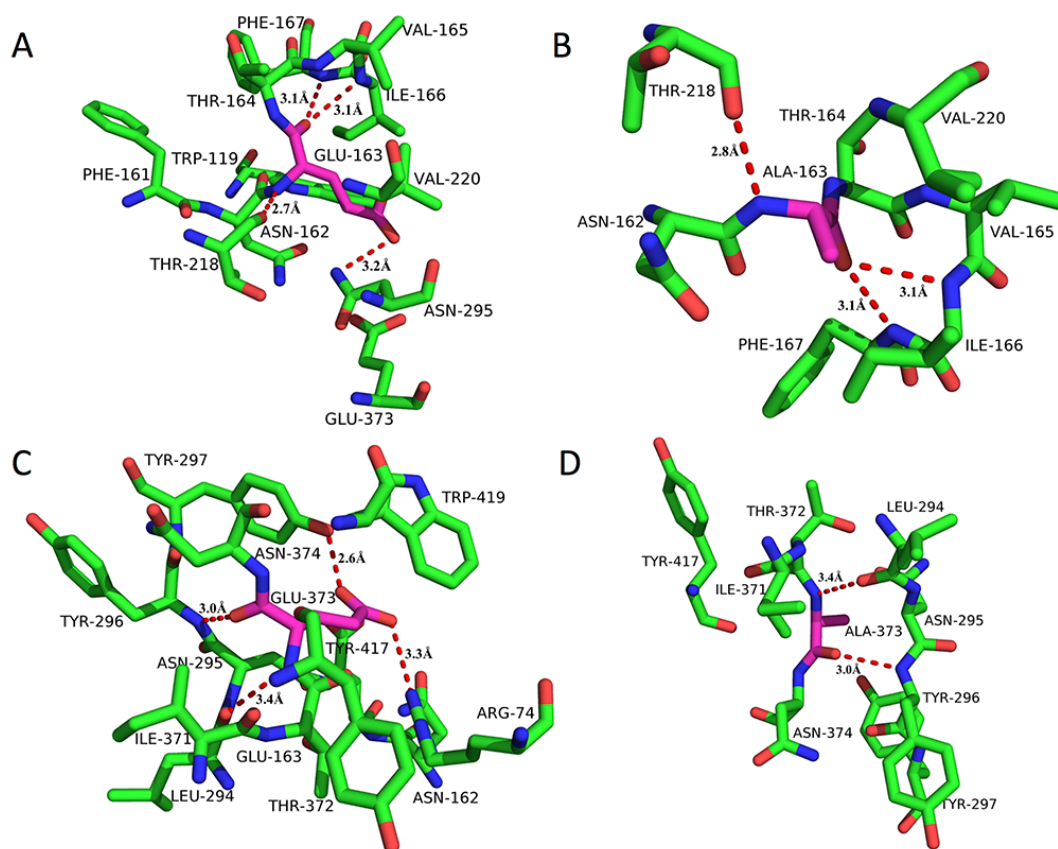

Supplement: Supplementary file [file 17866106]
